# Supplementary material
Source: publisher figshare collection journal article supplement (https://gsapubs.figshare.com/ndownloader/files/28894530)
Supplement: Supplementary file 1 [file 28894530]

## Sheet: Sample locations
Structural Belt	Formation	Sample	Domain	Latitude	Longitude
Auber Villiers main block	Auber Villiers Formation	AV-1	West-Central Domain	-25.875711°	30.983131°
Auber Villiers main block	Auber Villiers Formation	AV-2	West-Central Domain	-25.882050°	30.977250°
Remote Belt	Mapepe Formation	B2-1	West-Central Domain	-25.885506°	30.941857°
Remote Belt	Mapepe Formation	B2-10	West-Central Domain	-25.886770°	30.942400°
Remote Belt	Mapepe Formation	B2-16	West-Central Domain	-25.885250°	30.942410°
Remote Belt	Mapepe Formation	B2-4	West-Central Domain	-25.887410°	30.940890°
Remote Belt	Mapepe Formation	B2-7	West-Central Domain	-25.887219°	30.941850°
Remote Belt	Mapepe Formation	B2-8	West-Central Domain	-25.886740°	30.942780°
Conglomerate Hill	Mapepe Formation	CH-1	West-Central Domain	-25.90113°	30.93692°
Conglomerate Hill	Mapepe Formation	CH-13	West-Central Domain	-25.89914°	30.93765°
Conglomerate Hill	Mapepe Formation	CH-21	West-Central Domain	-25.89782°	30.93756°
Conglomerate Hill	Mapepe Formation	CH-4	West-Central Domain	-25.90142°	30.93688°
Conglomerate Hill	Mapepe Formation	CH-5	West-Central Domain	-25.90153°	30.93608°
Conglomerate Hill	Mapepe Formation	CH-7	West-Central Domain	-25.90192°	30.93537°
Conglomerate Hill	Mapepe Formation	CH-9	West-Central Domain	-25.90254°	30.93480°
Stolzburg Syncline	Ulundi Formation	FUI-5	Northern Domain	-25.865869°	30.947931°
Greywacke Hill	Mapepe Formation	GH-12	West-Central Domain	-25.906539°	30.926350°
Greywacke Hill	Mapepe Formation	GH-14	West-Central Domain	-25.906539°	30.926350°
Greywacke Hill	Mapepe Formation	GH-16	West-Central Domain	-25.908861°	30.913150°
Greywacke Hill	Mapepe Formation	GH-2	West-Central Domain	-25.907000°	30.925750°
Paulus Syncline	Mapepe Formation	NAD-184-11	East-Central Domain	-25.911850°	31.105450°
Paulus Syncline	Mapepe Formation	NAD-184-14	East-Central Domain	-25.911650°	31.105650°
Paulus Syncline	Mapepe Formation	NAD-184-15	East-Central Domain	-25.911850°	31.105450°
Paulus Syncline	Mapepe Formation	NAD-184-2	East-Central Domain	-25.922450°	31.102700°
Paulus Syncline	Mapepe Formation	NAD-184-3	East-Central Domain	-25.922210°	31.102575°
Paulus Syncline	Mapepe Formation	NAD-184-5	East-Central Domain	-25.922410°	31.101860°
Paulus Syncline	Mapepe Formation	NAD-184-7	East-Central Domain	-25.918530°	31.103960°
Paulus Syncline	Mapepe Formation	NAD-184-9	East-Central Domain	-25.914200°	31.106130°
Belt South of Inyoka	Mapepe Formation	NAD-185-12-2	West-Central Domain	-25.864890°	30.966820°
Belt South of Inyoka	Mapepe Formation	NAD-185-14	West-Central Domain	-25.865190°	30.964290°
Belt South of Inyoka	Mapepe Formation	NAD-185-2	West-Central Domain	-25.868010°	30.985310°
Belt South of Inyoka	Mapepe Formation	NAD-185-4	West-Central Domain	-25.867930°	30.985170°
Belt South of Inyoka	Mapepe Formation	NAD-185-7	West-Central Domain	-25.866860°	30.985330°
Paulus Syncline	Mapepe Formation	PS-1	East-Central Domain	-25.927200°	31.102150°
Paulus Syncline	Mapepe Formation	PS-2	East-Central Domain	-25.927390°	31.102380°
Southern Belt	Mapepe Formation	SB-1-10	Southern Domain	-25.914050°	31.015380°
Southern Belt	Mapepe Formation	SB-1-11	Southern Domain	-25.914070°	31.015030°
Southern Belt	Mapepe Formation	SB-1-12	Southern Domain	-25.913497°	31.019739°
Southern Belt	Mapepe Formation	SB-1-6	Southern Domain	-25.915530°	31.017110°
Southern Belt	Mapepe Formation	SB-1-9	Southern Domain	-25.915200°	31.016820°
Southern Belt	Mapepe Formation	SB-2-10	Southern Domain	-25.915080°	30.967010°
Southern Belt	Mapepe Formation	SB-2-13	Southern Domain	-25.914510°	30.966590°
Southern Belt	Mapepe Formation	SB-2-17	Southern Domain	-25.914010°	30.966500°
Southern Belt	Mapepe Formation	SB-2-3	Southern Domain	-25.915960°	30.966910°
Southern Belt	Mapepe Formation	SB-2-4	Southern Domain	-25.915897°	30.966895°
Southern Belt	Mapepe Formation	SB-2-8	Southern Domain	-25.915060°	30.966940°
Southern Belt	Mapepe Formation	SB-3-2	Southern Domain	-25.910630°	30.959710°
Southern Belt	Mapepe Formation	SB-3-8	Southern Domain	-25.910050°	30.958110°
Stolzburg Syncline	Sheba Formation	SSF-10	Northern Domain	-25.885000°	30.861200°
Stolzburg Syncline	Sheba Formation	SSF-16	Northern Domain	-25.887600°	30.863610°
Stolzburg Syncline	Belvue Road Formation	SSF-21	Northern Domain	-25.888309°	30.874139°
Stolzburg Syncline	Belvue Road Formation	SSF-26	Northern Domain	-25.891200°	30.868580°
Stolzburg Syncline	Belvue Road Formation	SSF-28	Northern Domain	-25.891200°	30.868580°
Stolzburg Syncline	Sheba Formation	SSF-4	Northern Domain	-25.884160°	30.860810°
Stolzburg Syncline	Sheba Formation	SSF-6	Northern Domain	-25.884330°	30.861000°

## Sheet: ICP-MS data
	AV-1	AV-2	B2-1	B2-10	B2-16	B2-4	B2-7	B2-8	CH-1	CH-4	CH-5	CH-7	CH-9	CH-13	CH-21	FUI-5	GH-12	GH-14	GH-16	GH-2	NAD-185-12-2	NAD-185-14	NAD-185-2	NAD-185-4	NAD-185-7	PS-1	PS-2	SB-1-10	SB-1-11	SB-1-12	SB-1-6	SB-1-9	SB-2-10	SB-2-13	SB-2-17	SB-2-3	SB-2-4	SB-2-8	SB-3-2	SB-3-8	SSF-10	SSF-16	SSF-21	SSF-26	SSF-28	SSF-4	SSF-6	NAD-184-2	NAD-184-3
stratigraphic height [m]	igneous	igneous	200	30	190	110	80	3	160	134.369	113.398	52.0388	18.6408	155.34	7.76699	1	32	30	1	11	350	400	20	27	125	155	127	283.8	294.6	300	180	210	67.8	102	146.4	6.6	18	70.8	600	670	130	360	420	600	700	30	55	140	132.881
REE and TE in ppm
La	24.3724	47.2603	27.6538	21.2347	31.3714	2.4567	14.4252	12.2023	10.6111	20.5688	15.6766	23.5233	14.4378	14.2057	14.7805	56.3953	40.7214	43.0516	15.6768	8.28416	17.2545	25.304	3.60159	2.39988	7.41231	13.981	12.6358	10.4189	44.0353	29.3553	0.454483	7.45938	20.5075	32.503	13.0122	48.6375	36.7837	44.7552	60.4178	4.41573	58.6756	31.5461	61.1821	15.5557	13.1519	11.139	67.9322	3.2059	9.63055
Ce	50.7619	92.323	46.4263	22.6441	42.5355	4.26342	24.4823	9.02003	20.0639	32.875	28.8386	35.012	25.3437	27.8213	26	18.7028	30.1806	22.063	30.8265	17.0362	30.2472	21.6489	6.45629	6.08551	15.7578	22.2414	19.2963	16.2459	40.3123	28.983	0.780305	13.6978	25.2698	31.4065	22.4055	98.947	42.7665	32.7819	13.4362	5.80636	53.2635	41.0577	45.0932	32.2429	27.0531	12.9946	62.4261	4.98918	18.2536
Pr	6.15548	11.1046	5.04575	4.16923	7.57011	0.560091	3.31315	2.42359	2.45556	4.59987	3.31784	4.95718	2.77813	3.28	3.31879	17.6589	12.4446	9.21558	3.37194	1.87609	3.66694	4.88431	0.84336	0.824901	2.05545	2.89804	2.81293	2.46349	11.9971	6.99114	0.0815642	1.63548	4.84099	7.80592	2.96639	10.285	5.77733	9.15292	7.448	1.09747	11.7543	5.6655	19.2007	3.95255	3.31	2.26153	14.0882	0.999397	2.28436
Nd	24.1202	42.5271	17.3817	14.9582	23.9526	2.35686	12.8787	7.32491	9.25204	17.6223	11.9762	18.9974	9.56595	12.6603	12.9179	70.2438	58.64	33.6335	11.4842	6.21372	13.2089	17.8223	3.36954	3.52624	8.07684	11.2103	11.4757	9.96465	51.8575	27.8117	0.30412	6.4185	18.5605	29.9036	11.4801	34.7766	18.0668	31.794	21.3492	4.36077	43.3407	20.4406	85.5397	15.4864	13.3624	8.43938	54.7914	4.30801	8.86984
Sm	5.25287	8.52239	3.38941	3.10586	3.56689	0.911264	2.89745	1.21064	2.09757	3.57089	2.33458	3.6235	1.74642	2.83843	3.26884	12.92	12.4326	5.97136	1.941	1.07592	2.37951	4.2492	1.00559	1.06049	2.05265	2.53961	2.65887	2.51386	10.9047	5.62882	0.0833119	1.02479	4.13269	5.99326	2.58694	6.69647	3.9311	6.24982	3.59222	1.11539	8.66752	4.08248	20.9088	3.21438	3.01961	1.87234	10.721	1.26935	2.01262
Eu	1.36072	2.24505	0.938001	0.962145	0.91156	0.428738	0.834621	0.322642	0.742528	1.07849	0.76224	1.07525	0.586688	0.902427	1.16088	3.02743	3.72328	1.63454	0.544304	0.24729	0.61864	1.20787	0.487098	0.380841	0.781342	0.823541	1.02515	0.751455	2.7687	1.51357	0.0344991	0.221419	1.21277	1.53578	0.852495	0.407854	0.716382	1.6155	1.04052	0.396606	2.00722	1.02936	5.27035	0.838772	0.825928	0.771887	2.45601	0.440929	0.569384
Gd	3.99411	5.72474	3.03436	3.0199	2.62794	1.85012	2.96771	0.793194	2.25148	3.44151	2.44459	3.1124	1.77754	2.92121	3.21575	7.07455	11.9387	4.6954	1.34922	0.782233	1.6726	4.55057	1.7332	1.50272	2.37765	2.94524	3.34839	3.29537	9.54536	6.04961	0.0855608	0.716787	4.02169	5.07319	2.46598	6.55509	4.12405	5.17083	3.4087	1.55057	7.24411	3.76688	18.1974	2.68999	2.74311	1.88737	9.73034	1.55055	1.89694
Tb	0.521346	0.728752	0.449175	0.536839	0.425069	0.418974	0.472945	0.126093	0.392668	0.585545	0.46259	0.508359	0.356337	0.492459	0.593743	1.05536	1.5128	0.620399	0.190126	0.100532	0.256241	0.768284	0.387543	0.33088	0.431228	0.540009	0.593626	0.550698	1.39003	0.891825	0.0144035	0.126049	0.628127	0.775709	0.415539	1.32201	0.92287	0.791846	0.553193	0.315867	1.07583	0.742218	2.44843	0.404161	0.416092	0.338311	1.30301	0.298916	0.340854
Dy	2.43948	3.39987	2.65682	3.51396	2.7335	3.12392	2.90275	0.751535	2.44388	3.80648	3.12277	3.19109	2.36861	3.16221	3.73644	6.32627	7.72348	3.31879	0.955224	0.482801	1.61647	4.5454	2.77259	2.28697	2.75762	3.58579	4.10535	3.20907	7.42693	5.31497	0.0953784	0.811947	3.94537	4.63282	2.75494	9.83036	6.33342	4.64607	3.36983	2.13113	6.07671	4.23177	11.5838	2.35547	2.34746	2.25969	7.23352	2.12637	2.29603
Ho	0.381062	0.530265	0.517791	0.752914	0.580439	0.674826	0.642501	0.150972	0.513253	0.786111	0.670389	0.664731	0.517711	0.673396	0.802404	1.27282	1.48093	0.61285	0.170331	0.0833152	0.345766	0.914491	0.625387	0.489959	0.626087	0.76921	0.922551	0.621443	1.29503	1.17753	0.0193403	0.182031	0.816653	0.963228	0.599417	2.25278	1.24711	0.967643	0.71128	0.470488	1.19824	0.880347	1.76043	0.461153	0.455447	0.506148	1.42204	0.460984	0.512602
Er	0.828005	1.1313	1.42344	2.11678	1.61675	1.98801	1.77537	0.445651	1.3648	2.27131	1.88169	1.88318	1.49614	1.88459	2.2046	3.57065	3.56146	1.50817	0.375074	0.197839	1.01269	2.48435	1.88066	1.42143	1.80081	2.13058	2.69838	1.66041	3.06352	3.38403	0.0643149	0.521854	2.32361	2.6903	1.68947	6.91722	3.27069	2.65376	1.95559	1.3657	3.17456	2.44213	3.74817	1.23858	1.22591	1.51622	3.6286	1.32764	1.50213
Tm	0.108406	0.142146	0.21262	0.321864	0.240044	0.290361	0.270297	0.0673355	0.206607	0.332944	0.283116	0.282428	0.226015	0.27736	0.33946	0.543058	0.492938	0.202799	0.0445801	0.0254793	0.166316	0.373925	0.285229	0.20656	0.266675	0.308958	0.370639	0.231644	0.41692	0.473391	0.00835166	0.0815379	0.349847	0.39625	0.254417	1.12639	0.46415	0.390598	0.289393	0.21186	0.464919	0.368628	0.478555	0.184425	0.177699	0.236676	0.491987	0.195002	0.217714
Yb	0.613287	0.774189	1.29118	2.05409	1.51856	1.7982	1.67314	0.442546	1.29859	2.20199	1.82066	1.76854	1.45422	1.71102	2.11786	3.52743	2.87395	1.2556	0.266685	0.135081	1.0514	2.33732	1.87568	1.35274	1.6859	1.91694	2.26166	1.46267	2.37228	2.74261	0.044935	0.503793	2.20137	2.50466	1.58683	7.3179	3.12087	2.38842	1.84158	1.31613	2.84387	2.26455	2.84855	1.10281	1.08432	1.52696	2.84159	1.22198	1.43645
Lu	0.0875454	0.105397	0.20126	0.318752	0.234786	0.282756	0.267898	0.0697972	0.207111	0.330753	0.289876	0.284587	0.237246	0.274331	0.329858	0.56605	0.453948	0.187462	0.0371509	0.0158949	0.158243	0.370813	0.294305	0.21015	0.261607	0.297621	0.364409	0.202959	0.359534	0.465473	0.00557736	0.0817926	0.346349	0.406211	0.255208	1.11015	0.466269	0.403142	0.297577	0.203701	0.436458	0.353554	0.396208	0.169715	0.165008	0.240004	0.441759	0.199088	0.225833
Ba	495.355	531.323	15224.4	4830.66	6386.92	4323.74	271.394	117.966	1858.03	2085.11	2763.71	610.556	1459.57	7215.33	1522.03	396.037	6969.94	3158.94	866.32	2032.66	514.277	599.828	2341.45	765.804	259.681	1913.88	1562.86	1567.16	1787.12	1192	14.3826	583.508	410.23	303.392	1299.38	588.839	953.395	205.105	1385.16	1719.78	633.925	642.34	2075.19	240.826	208.161	223.89	1111.31	482.783	897.697
Th	4.55102	5.08764	3.8612	3.48304	2.34629	3.13297	2.88217	1.6035	2.56165	3.89146	4.00432	3.38175	3.52019	3.38012	3.70679	6.33016	3.98219	2.24988	4.43047	5.50956	3.55328	5.3844	4.59416	3.72384	1.88175	3.04296	1.44606	5.46334	4.52951	5.67616	0.107372	1.16877	4.22506	4.39833	2.56519	24.3949	38.1126	4.38753	2.38188	3.46768	6.58962	5.9057	27.7453	2.91085	2.39455	5.63772	5.86241	1.47146	2.10078
Nb	9.06874	11.5882	6.14366	5.72484	4.88109	6.45809	4.56623	1.70093	4.44459	6.21513	6.50094	5.3155	5.84299	5.9558	5.82426	8.32051	6.99342	3.62486	3.76555	3.46701	4.91839	7.91059	6.16736	5.59475	3.15327	4.7738	3.42182	7.73948	7.26559	6.09359	0.256602	1.91468	6.07686	6.05288	4.25581	26.622	27.9173	5.98792	4.49293	5.23018	9.98395	9.73656	21.2448	4.10316	3.71299	8.13742	8.58021	2.94777	3.98025
Y	10.2138	13.7455	13.9343	20.3416	14.4964	17.9989	18.1867	3.63525	12.5617	20.0646	16.9851	17.1379	14.1217	16.9953	20.43	30.5051	35.2123	14.7704	3.96515	1.90398	8.91037	22.2244	16.9687	12.6255	16.2984	19.9597	30.0908	15.5523	29.1128	41.238	0.602393	5.48216	21.2194	25.6185	16.0543	59.8671	28.4179	25.0864	17.956	12.7782	30.7277	23.2633	31.0485	11.4186	12.759	12.8533	38.7843	11.5379	12.6912
Hf	4.50118	5.75864	3.05014	2.46048	2.4787	2.87752	2.04897	0.535365	2.11649	2.56776	2.96553	2.55351	2.64265	2.90004	2.69232	2.9083	3.13984	1.81311	1.74887	1.13984	2.0497	3.66451	3.04223	2.3917	1.07322	2.45604	1.85395	3.42683	3.05157	2.96101	0.109325	0.795369	2.62727	2.66189	2.09984	8.16528	10.6794	2.61019	2.09555	2.58616	3.88171	3.19779	6.93098	2.75125	2.26409	4.24174	3.13315	1.48222	1.93125
Ta	0.634774	0.778874	0.559728	0.513112	0.419004	0.576857	0.434903	0.240461	0.414113	0.572414	0.588298	0.492854	0.496165	0.555565	0.504186	0.773117	0.606938	0.349057	0.317621	0.395003	0.468033	0.724652	0.576392	0.491604	0.260675	0.411357	0.294522	0.725965	0.642158	0.563224	0.0995374	0.228832	0.542619	0.557165	0.392155	2.15251	3.07795	0.563258	0.408963	0.457522	0.882604	0.863167	2.85145	0.355796	0.29196	0.712541	0.730903	0.248948	0.327505
U	1.22713	1.36073	1.00535	1.11588	0.867625	1.13904	0.860995	0.423458	1.20361	1.06846	1.19626	1.10208	1.18021	1.10025	1.20077	1.95441	1.24389	0.754798	1.30668	1.31871	1.05596	1.7829	1.28365	1.12713	0.64878	0.915949	0.446045	1.43868	1.49978	1.44238	0.0565368	0.431786	1.38713	1.44468	0.905528	5.41461	7.18482	1.45437	0.83007	0.941635	1.96626	1.45794	8.38295	0.919485	0.63834	1.74287	1.66425	0.480409	0.591774
Pb	9.06873	3.76636	5.30631	1.94015	4.2137	7.79461	0.731478	1.04522	6.72863	2.71855	2.0832	4.39295	4.09938	7.55715	4.4254	27.1647	1.26411	0.846454	1.16325	0.745835	2.38425	7.84322	8.35898	9.85038	5.61042	12.9207	0.710116	3.2913	4.96802	6.00426	1.46776	0.975006	1.39011	1.69518	2.01968	4.3362	26.435	1.49948	1.1957	1.50731	2.1845	1.47129	8.14137	13.9556	9.53259	10.0518	4.40757	2.10473	1.25373
Rb	42.3215	96.4762	121.985	91.5629	110.682	116.645	7.37694	3.38757	69.8338	92.5678	137.041	65.7181	64.452	92.6091	79.4155	93.0386	119.467	53.5324	32.8734	37.4149	83.4189	123.553	116.176	125.113	64.3669	151.957	113.348	163.071	187.857	94.3566	0.18901	4.81464	11.7669	12.0701	81.8183	181.021	295.885	7.91453	27.6667	85.8084	114.825	224.767	362.727	26.0116	25.439	60.0638	127.75	52.1796	65.0965
Cs	2.6139	2.86881	3.45641	2.7452	3.16858	3.37183	1.01646	0.319113	2.254	2.29283	2.79627	1.10206	1.0956	2.95116	1.46748	3.54671	3.29045	1.40794	0.99476	1.31964	3.07766	3.67308	3.96615	6.70204	4.24051	5.85262	2.85299	7.54759	9.01885	2.41648	0.0695772	0.213706	0.419862	0.595192	1.45814	5.37773	9.56738	0.385414	1.00272	3.74472	3.2539	7.28006	14.7465	7.2331	6.12429	0.963187	3.06126	2.3312	2.3183
Sr	364.322	87.1365	19.6356	17.7408	19.0951	37.8795	4.30425	3.2829	18.6582	16.6176	15.1284	8.18122	7.49662	27.2274	9.51766	4.53985	16.8321	7.85138	9.77019	4.82601	99.8382	26.6739	3.21057	2.6028	8.56574	7.23075	5.00348	6.05469	26.7653	13.7173	0.987579	2.74222	25.5053	25.2371	7.27643	2.33808	21.7129	17.4998	60.5569	7.52404	29.208	5.98438	39.8853	206.91	328.279	3.61368	16.2043	4.21634	7.17436
Sc	3.67169	3.25004	16.0737	22.1615	28.8813	24.2799	15.1272	2.41561	21.0179	26.6938	25.557	20.8262	22.1078	22.8232	25.002	27.363	17.9305	13.6589	2.1761	0.736861	18.4824	26.9994	20.6202	21.9186	10.7942	33.1965	24.8384	19.7369	22.6382	13.3998	0.366497	1.68278	17.6516	17.367	12.583	2.46397	7.89676	17.2168	21.3558	20.9212	26.559	19.2901	4.60389	12.5591	16.8703	11.897	28.3583	22.7586	30.5458
Zr	169.513	218.408	114.222	92.6423	92.9106	109.085	77.3943	20.2783	81.4025	95.2285	108.622	97.3602	101.844	107.737	99.8132	108	104.771	67.6651	72.2699	40.1389	74.7039	137.705	116.632	87.4039	49.0804	88.5466	64.4642	124.82	113.719	112.588	4.27181	29.1276	104.284	99.898	79.9079	256.157	362.708	97.4721	77.0782	98.7248	142.327	114.407	217.794	103.917	84.2654	155.897	112.231	53.3136	70.405
[truncated: 6 more columns]

## Sheet: XRF data
	AV-1	AV-2	B2-1	B2-10	B2-16	B2-4	B2-7	B2-8	CH-1	CH-13	CH-21	CH-4	CH-5	CH-7	CH-9	FUI-5	GH-12	GH-14	GH-16	GH-2	NAD-184-11	NAD-184-14	NAD-184-15	NAD-184-2	NAD-184-3	NAD-184-5	NAD-184-7	NAD-184-9	NAD-185-12-2	NAD-185-14	NAD-185-2	NAD-185-4	NAD-185-7	PS-1	PS-2	SB-1-10	SB-1-11	SB-1-12	SB-1-6	SB-1-9	SB-2-10	SB-2-13	SB-2-17	SB-2-3	SB-2-4	SB-2-8	SB-3-2	SB-3-8	SSF-10
stratigraphic height [m]	igneous	igneous	200	30	190	110	80	3	160	155.34	7.76699	134.369	113.398	52.0388	18.6408	1	32	30	1	11	1	1.5	3	140	132.881	123.39	54.5763	109.864	350	400	20	27	125	155	127	283.8	294.6	300	180	210	67.8	102	146.4	6.6	18	70.8	600	670	130
Normalized major elements in wt. %
SiO2	67.1802	70.9962	78.9812	70.8489	70.5794	77.3313	63.6897	93.6799	71.9058	77.5979	70.6231	65.5699	72.3824	72.783	69.9222	56.7352	74.6586	79.4554	89.3573	92.9492	92.4215	70.7792	51.4839	73.0501	61.6599	59.8407	49.5893	64.993	74.5378	58.3973	64.9392	53.1081	41.749	61.909	55.4665	72.7518	68.6219	75.5789	98.6886	94.9533	62.3328	64.224	74.1769	75.5612	60.0755	63.7601	66.1236	67.5441	64.9688
TiO2	0.564686	0.826215	0.705801	0.63068	0.823089	0.772936	0.548703	0.0807138	0.504551	0.706705	0.73982	0.747944	0.832021	0.624921	0.702817	0.710567	0.598246	0.415032	0.170221	0.0610127	0.171493	0.729695	0.827137	0.558819	0.745871	0.653502	0.815019	0.632668	0.504665	0.764467	0.640681	0.606808	0.219338	0.926925	0.859318	0.707571	0.751492	0.500233	0.0156322	0.226305	0.653743	0.61644	0.500726	0.147639	0.266473	0.614594	0.631056	0.615765	0.985465
Al2O3	16.5592	20.6123	14.4208	14.035	14.9091	17.9119	11.8308	2.10194	10.0883	12.8187	15.3264	17.6592	17.6206	13.2104	14.518	18.6513	14.1116	9.23825	5.24708	4.72961	5.07616	19.3191	32.828	11.7217	14.0279	12.5414	14.1141	13.5078	14.3947	18.4092	12.8353	12.4959	5.66806	17.4332	14.5382	16.0832	18.665	12.2837	0.326397	1.9849	11.7141	11.3194	11.122	15.2851	24.7798	11.2682	11.9272	14.234	16.1628
FeO*	4.52263	1.11521	0.846467	10.511	8.70503	0.539829	20.4261	3.41682	15.1774	5.38402	9.47219	11.5887	4.73888	10.1471	12.3893	21.5827	5.48995	7.31076	2.59909	0.414117	0.434733	1.47204	2.27223	12.9826	17.9263	21.845	29.8358	17.7167	7.06452	16.2029	17.7955	28.9494	50.7155	12.1024	24.0453	3.24141	3.6181	5.82	0.757232	1.78984	20.702	19.6888	10.4018	1.65527	3.17204	20.0512	16.0558	14.9841	9.73155
MnO	0.0268477	0.00752046	0.00137009	0.0218332	0.00593783	0.0017484	0.203196	0.008803	0.00891668	0.00461167	0.00970206	0.012748	0.00104383	0.0200141	0.00110489	0.00469074	0.0460367	0.0726216	0.207682	0.00299177	0.00130317	0.00141301	0.00238177	0.00955941	0.0467101	0.0495673	0.118435	0.0221656	0.00296592	0.083444	0.0626763	0.0053809	0.0786643	0.026863	0.0460866	0.00190691	0.00425424	0.137018	0.00429415	0.00399167	0.120813	0.132008	0.0423282	0.00241913	0.00476254	0.13003	0.115659	0.0169887	0.0443996
MgO	1.65875	0.271645	0.69805	1.45372	0.439699	0.222585	3.01431	0.618492	0.0784418	0.127837	0.935392	1.50271	0.209135	1.11469	0.128057	0.364848	1.37082	1.84478	0.814979	0.349094	0.244248	1.23116	1.75856	0.332975	3.88708	4.64752	0.857063	0.487558	0.163353	2.1882	0.46376	0.667943	0.458848	3.83088	3.16818	1.40018	1.59997	1.90201	0.178878	0.800269	4.07178	3.61915	1.79086	1.54901	2.2315	3.89501	4.32075	0.44752	4.76261
CaO	1.72026	0.276675	0	0	0.00356962	0.00596481	0	0	0.0113703	0	0	0.00601035	0	0	0.000142058	0.00950885	0	0	0.123454	0.0264213	0.00224266	0.00571438	0.00429983	0.00830834	0.00621674	0.00622483	0.00767746	0.00120512	0	0	0.00238144	0	0	0	0.000628429	0	0	0.00759275	0.0088231	0.0294528	0	0.00578919	0	0	0	0.00158277	0.000839743	0	0.000921482
Na2O	5.939	0.734776	0	0	0	0.0407942	0	0	0	0	0	0	0.00543726	0	0	0	0	0	0	0	0	0	0.0329969	0	0	0	0	0	0.777404	0.0695437	0	0	0	0	0	0	0	0	0	0	0	0	0	0	0	0	0	0	0
K2O	1.65547	4.90821	4.3264	2.45138	4.44496	3.16345	0.238902	0.0759457	2.12737	3.30638	2.85018	2.87569	4.17595	2.06603	2.31965	1.90891	3.66358	1.62737	1.39523	1.42643	1.66545	6.45777	10.7582	1.32161	1.6595	0.401911	4.55245	2.58311	2.48223	3.76105	3.17813	4.07281	0.833955	3.71531	1.83103	5.78801	6.65445	3.69523	0.0010905	0.174848	0.314998	0.304828	1.91008	5.78389	9.44202	0.192866	0.756923	2.05222	3.27925
P2O5	0.172951	0.251277	0.0199119	0.0474775	0.0892445	0.00945095	0.0481937	0.0174009	0.0978448	0.0538581	0.0431723	0.0369952	0.0344827	0.033812	0.0187779	0.0323201	0.0612038	0.0357988	0.0850113	0.0411151	0.0131832	0.0153769	0.0322909	0.0633765	0.0800986	0.0634785	0.137294	0.0884581	0.0723598	0.123892	0.0824041	0.0935702	0.276649	0.0553753	0.0447539	0.0259168	0.0848735	0.0753142	0.0190289	0.0370659	0.0898879	0.0895458	0.0553423	0.0154788	0.0278136	0.08634	0.0681346	0.105318	0.0641773
Trace elements in ppm
Ni	8.92125	19.2568	38.246	233.629	101.248	125.072	270.144	109.939	117.654	46.1183	279.032	407.224	58.8045	268.351	132.561	326.881	178.45	264.222	11.4345	6.633	19.303	61.093	44.847	200.5	461.68	496.089	449.746	140.592	151.951	410.924	169.309	146.572	86.1285	419.375	416.874	72.1542	215.893	458.667	22.563	43.1688	288.787	469.069	277.452	12.0697	56.118	275.7	448.397	150.375	370.737
Cr	23.1075	20.1432	1048	1188.4	1065.23	1016.76	863.596	75.4975	955.596	902.216	1064.05	1089.62	999.776	1029.48	820.957	1109.85	568.947	511.131	14.751	6.98475	176.016	705.157	94.743	1141.4	1366.63	1297.2	1859.99	1315.12	827.99	987.212	1416.65	929.78	293.631	1482.39	2197.03	1202.87	1054.04	793.139	42.9008	341.524	933.544	817.388	560.147	27.2328	100.196	829	939.877	983.905	1099.38
Sc	4.29	3.10275	16.1893	21.3032	28.3045	22.9642	14.874	2.121	21.5	22.7357	25.1955	25.6857	24.676	19.303	21.978	26.796	17.3695	13.333	2.673	0.35175	6.368	17.4125	16.137	22.4	29.7505	25.443	41.5135	24.644	17.7162	26.0647	20.0005	22.7585	10.7557	33.199	25.551	19.297	21.9477	13.86	0.5175	1.562	17.0347	17.796	12.269	3.24175	7.91025	17.45	21.9895	20.5002	26.6162
V	53.3325	64.3205	162.055	161.6	222.499	164.217	124.871	23.23	126.38	172.633	181.813	193.417	203.925	148.603	178.992	173.514	132.25	96.4652	15.4935	5.5275	37.9095	119.102	72.765	164.1	206.661	193.149	231.724	143.824	144.507	182.454	142.51	146.834	68.1267	237.603	209.916	155.95	184.797	96.8715	6.67575	24.18	143.715	129.923	112.169	4.4425	16.2185	133.3	156.016	151.326	186.911
Ba	486.135	518.75	14247.6	4746.66	6059.35	4187.63	280.144	116.605	1858.39	6823.61	1517.08	2107.31	2673.91	612.323	1469.56	390.572	6541.63	3107.34	839.074	1959.2	130.046	282.182	538.263	480.9	906.445	254.133	845.19	764.469	500.232	598.485	2365.79	798.417	268	1891.74	1619.86	1535.13	1731.52	1179.63	15.0075	578.635	415.567	306.756	1277.15	562.832	935.947	209.45	1394.19	1695.51	624.462
Rb	43.1183	96.693	118.685	89.8977	108.536	115.934	9.7515	4.1085	69.6952	91.9425	79.734	93.4495	136.695	66.7387	64.602	89.4007	117.963	54.015	33.659	37.8732	48.555	145.427	284.8	54.39	66.495	15.811	147.459	116.028	82.807	119.962	112.575	119.692	63.3475	146.407	110.75	162.825	183.601	93.6535	1.06575	6.0245	13.2482	13.5085	80.5462	176.536	289.38	9.506	28.3725	81.9887	112.71
Sr	363.285	89.1425	19.6995	17.0427	19.0507	38.8432	3.3165	2.2725	18.8533	27.5615	9.8505	16.5585	15.92	7.71125	7.524	4.82125	17.0705	7.2635	9.7515	4.87425	7.96	5.0745	17.226	4.2	6.6665	5.049	2.5375	6.161	98.0097	27.1178	3.626	3.03175	8.148	7.94	4.845	6.64925	28.2492	13.761	0.3105	2.1135	23.517	22.9082	7.182	2.991	23.283	16.05	59.2025	6.91675	29.9495
Zr	165.547	216.486	112.213	90.4733	90.898	110.051	76.8322	21.614	80.148	106.535	99.391	96.0197	108.492	98.7602	102.465	106.418	104.622	66.665	69.597	40.5517	44.6755	175.606	341.621	53	70.1475	61.182	74.704	122.372	73.493	134.316	116.319	87.1827	51.1167	85.602	65.994	123.939	110.742	111.175	6.21	30.0765	102.457	96.4522	77.9547	247.57	356.474	92.8	76.4657	94.084	140.623
Y	10.335	13.2975	13.885	20.2015	14.4502	17.9895	18.6427	4.5955	12.9677	17.114	20.8395	20.698	16.9647	17.6115	14.652	30.2977	34.8847	14.8255	4.158	2.9145	8.955	32.7355	48.213	12.2	13.134	9.702	20.8075	35.653	8.9335	22.1555	17.5805	14.2817	18.573	19.7518	30.804	15.1498	28.1985	40.887	1.39725	6.34425	21.6578	25.3125	16.0098	58.6017	27.064	24.6	18.4075	12.881	30.248
Nb	8.58	11.032	5.514	5.764	4.9015	5.829	4.221	0.909	4.288	5.22375	5.544	6.08425	5.97	5.0745	5.5935	8.0185	6.4995	3.33325	3.465	3.015	3.2835	15.323	19.008	2.5	4.0795	2.871	3.5525	6.565	4.5655	7.76975	5.48925	5.703	2.7945	4.46625	3.315	7.6005	6.7985	6.138	0	1.71575	5.7285	5.26225	3.691	25.3855	27.661	5.5	4.82575	4.91175	9.60175
Ga	19.89	24.4772	14.6362	14.6867	16.2457	15.3262	14.1705	5.252	11.921	15.8205	17.325	18.5048	19.4522	14.925	16.0875	23.9032	16.4742	10.8953	6.9795	6.03	7.4625	22.9845	32.373	12.3	15.2235	12.771	14.7175	15.655	18.1115	21.0532	12.7455	15.5153	11.322	17.0215	15.402	17.5005	19.797	12.573	1.60425	2.92025	13.9192	13.133	12.5705	23.5408	27.86	13.15	12.6365	14.4352	20.4473
Cu	7.605	4.925	7.51975	17.2925	40.3472	15.5272	9.89925	24.0885	59.4497	8.00975	115.483	41.2977	17.313	114.923	37.521	38.9252	20.7435	26.666	12.8205	1.1055	1.99	4.179	6.831	31.7	66.9635	15.147	86.884	26.361	38.8573	81.0025	35.7155	12.0203	18.8075	63.9165	17.442	46.2522	59.1	60.7365	2.07	10.775	8.99475	40.551	49.575	7.93125	2.786	14.75	81.9382	18.8975	45.7203
Zn	62.3513	12.3125	13.0297	136.537	68.1497	7.78875	147.986	16.766	96.057	29.6013	32.0265	144.49	2.83575	51.9887	6.93	43.3912	61.2865	85.2715	10.593	5.829	4.975	20.895	27.918	13.3	92.535	94.248	159.253	72.316	100.942	143.411	70.7267	59.6477	79.3007	109.223	106.335	22.2542	62.5502	106.276	0	2.068	161.303	253.786	44.7895	30.3747	53.5808	194.7	247.108	26.9195	139.151
Pb	8.62875	4.6295	7.1195	2.90675	5.65225	8.7435	0.804	1.515	6.5345	8.159	4.059	3.59225	3.23375	4.8755	4.356	25.172	2.48025	1.791	1.584	2.01	5.2735	3.2835	21.879	2.6	1.4925	0.396	2.9435	9.696	2.67875	7.86875	8.9665	11.097	7.90925	12.9515	2.652	3.75225	5.1015	6.138	2.484	1.96875	1.9095	3.05575	3.091	5.23575	26.4173	2.15	1.393	2.6565	2.4875
La	25.4475	46.2458	25.2665	21.2017	29.701	2.01	15.3765	13.9885	9.3725	13.6315	14.355	20.35	16.5667	22.885	13.563	53.998	36.776	40.795	15.741	9.49725	30.248	38.606	98.505	1.9	10.2485	33.462	1.5225	29.29	18.212	25.9647	1.612	3.07975	7.91075	12.207	13.056	10.4518	43.289	28.512	0	7.81375	20.1502	30.0217	12.1623	44.986	34.427	43.75	58.8543	6.06175	55.7697
Ce	48.6525	88.7485	39.4965	21.8072	41.514	0.9045	27.135	6.464	20.447	25.8203	26.3835	34.2642	26.865	35.82	25.5915	21.4165	25.8028	23.4323	29.799	14.673	27.661	59.7	138.699	4.3	26.069	29.997	11.774	12.928	31.4602	24.6605	7.30575	4.62725	10.847	22.134	21.42	15.0527	38.7045	29.799	0.207	11.793	27.7882	32.2362	23.4347	93.132	41.79	32.15	14.8753	9.92175	52.8842
Th	4.3875	4.4325	3.15725	3.30825	2.25025	2.56275	2.56275	1.414	2.34275	3.53225	3.8115	3.64075	3.184	2.8855	3.861	6.24225	3.076	1.54225	4.158	4.47225	4.0795	14.2285	16.533	1.4	2.388	2.871	2.7405	6.464	3.0765	5.26325	3.9295	4.05775	1.3725	3.674	1.581	5.04925	4.45025	5.445	0	0.90375	3.7185	4.01025	2.44325	22.9425	36.9642	4.25	2.0895	2.95775	5.62175
Nd	22.815	40.385	14.2	16.5905	23.1482	1.25625	13.9695	6.464	9.7745	12.338	12.276	16.558	11.144	16.8652	9.3555	70.3395	54.252	33.6808	11.1375	4.87425	20.099	26.5665	61.578	4.9	9.6515	28.809	8.12	28.886	12.9975	18.6442	3.274	1.901	7.15725	10.7207	11.883	9.2015	50.903	27.225	0.207	4.939	19.5472	30.3777	13.115	32.0215	17.6115	32.3	21.2432	4.66525	42.586
U	1.56	1.97	1.60575	2.55575	2.14675	1.3065	2.86425	0.606	2.1445	1.64175	1.683	1.6955	1.74125	2.73625	1.683	1.5225	2.13275	1.8905	2.178	1.005	1.4925	3.184	6.831	2.5	2.786	1.188	0.5075	2.828	1.93425	3.60825	3.02175	2.211	3.5015	2.28175	1.275	2.05125	3.2985	2.673	0	1.006	2.46225	1.20225	2.24425	5.83475	6.965	2	2.03975	2.104	1.94025
[truncated: 6 more columns]
